# Supplementary material for: Biomimetic synthesis of galantamine via laccase/TEMPO mediated oxidative coupling
Source: Royal Society of Chemistry journal article supplement (doi:10.1039/d0ra00935k), 2020-01-01

## **Biomimetic synthesis of galantamine via laccase/TEMPO mediated oxidative coupling**

Claudio Zippilli,<sup>a</sup> Lorenzo Botta,<sup>a</sup> Bruno Mattia Bizzarri,<sup>a</sup> Maria Camilla Baratto,<sup>b</sup> Rebecca Pogni,<sup>b</sup>  
Raffaele Saladino<sup>a\*</sup>

<sup>a</sup>Department of Ecological and Biological Sciences, University of Tuscia, via S. C. De Lellis 44, 01100, Viterbo, Italy

<sup>b</sup>Department of Biotechnology, Chemistry and Pharmacy, University of Siena, via Aldo Moro 2, 53100 Siena, Italy

### **Supplementary Information**

**1D and 2D NMR spectra (table S1)**

**S2-25 (S14)**

**EPR spectra**

**S26-27**

# 1D and 2D NMR spectra

## <sup>1</sup>H-NMR of 4-bromo-5-({[2-(4-hydroxyphenyl)ethyl]amino}methyl)-2-methoxyphenol (III)

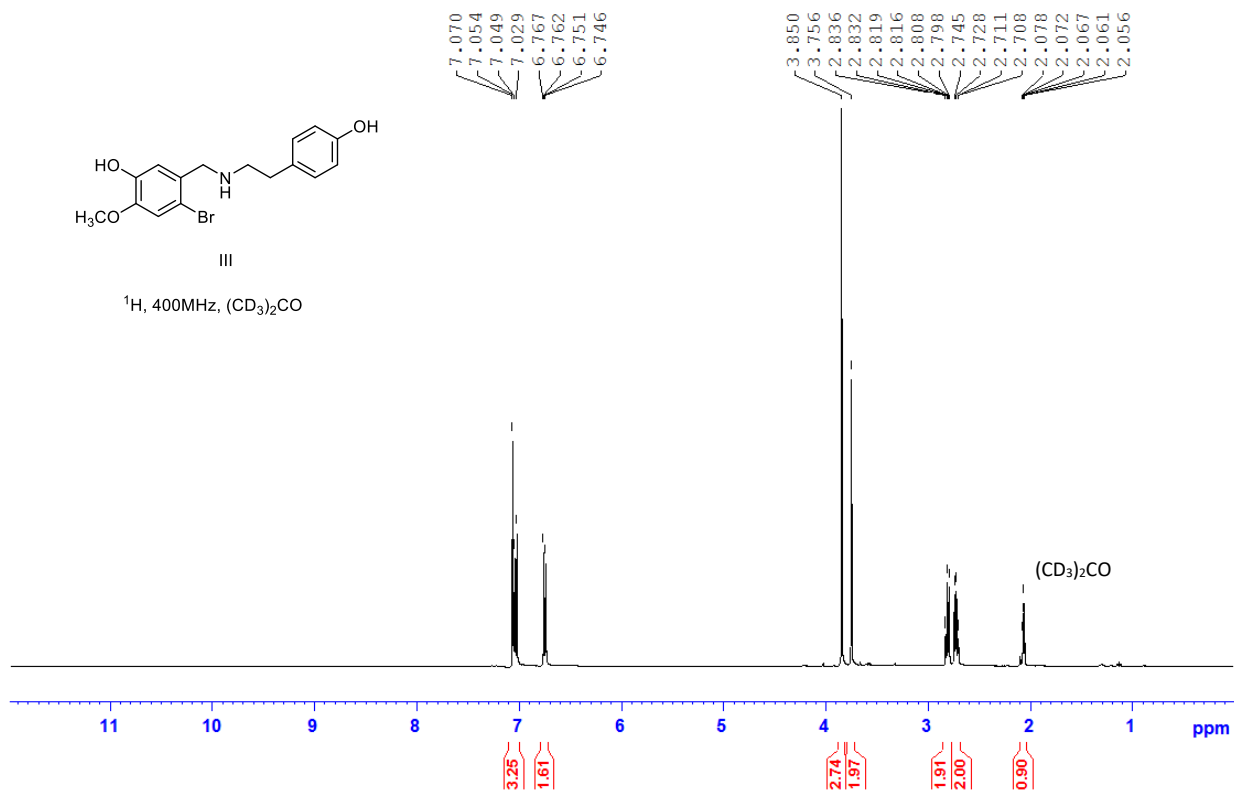

<sup>13</sup>C-NMR of 4-bromo-5-([2-(4-hydroxyphenyl)ethyl]amino)methyl)-2-methoxyphenol (III)

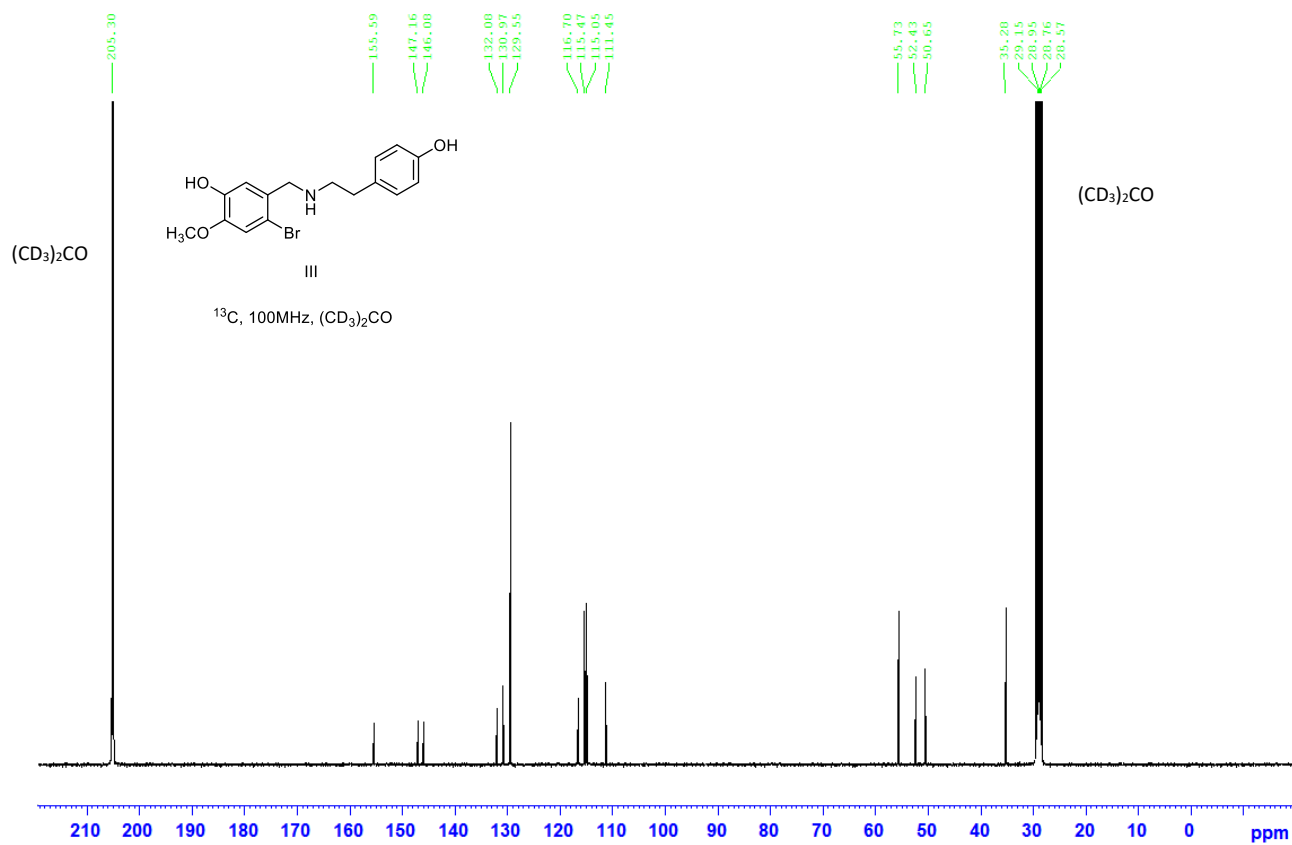

DEPT-135 of 4-bromo-5-({[2-(4-hydroxyphenyl)ethyl]amino}methyl)-2-methoxyphenol (III)

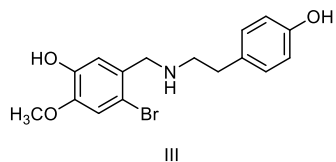

DEPT 135, 100MHz, (CD<sub>3</sub>)<sub>2</sub>CO

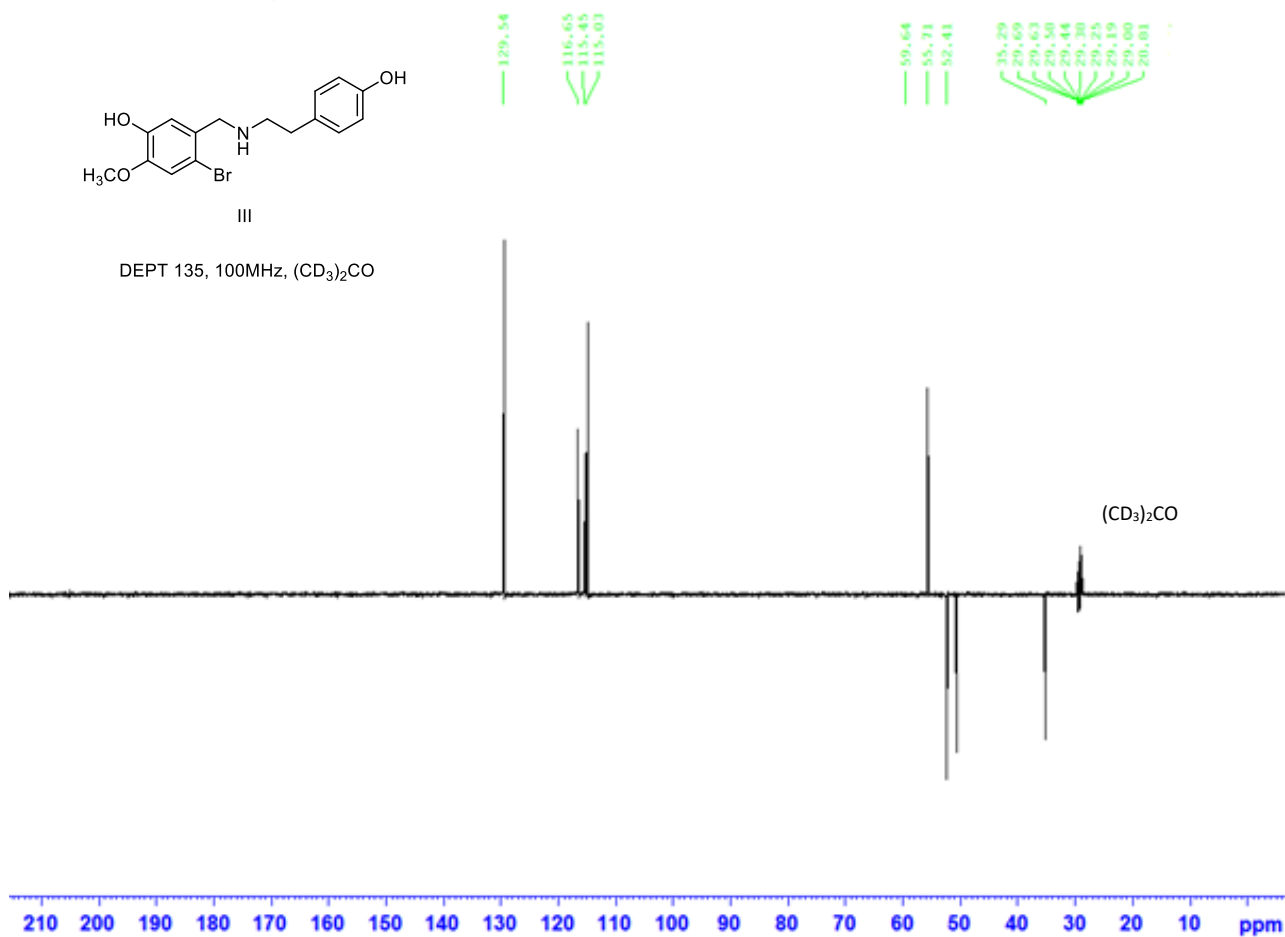

<sup>1</sup>H-NMR of 4-bromo-5-({[2-(4-hydroxyphenyl)ethyl]amino}methyl)-2-methoxyphenol (4)

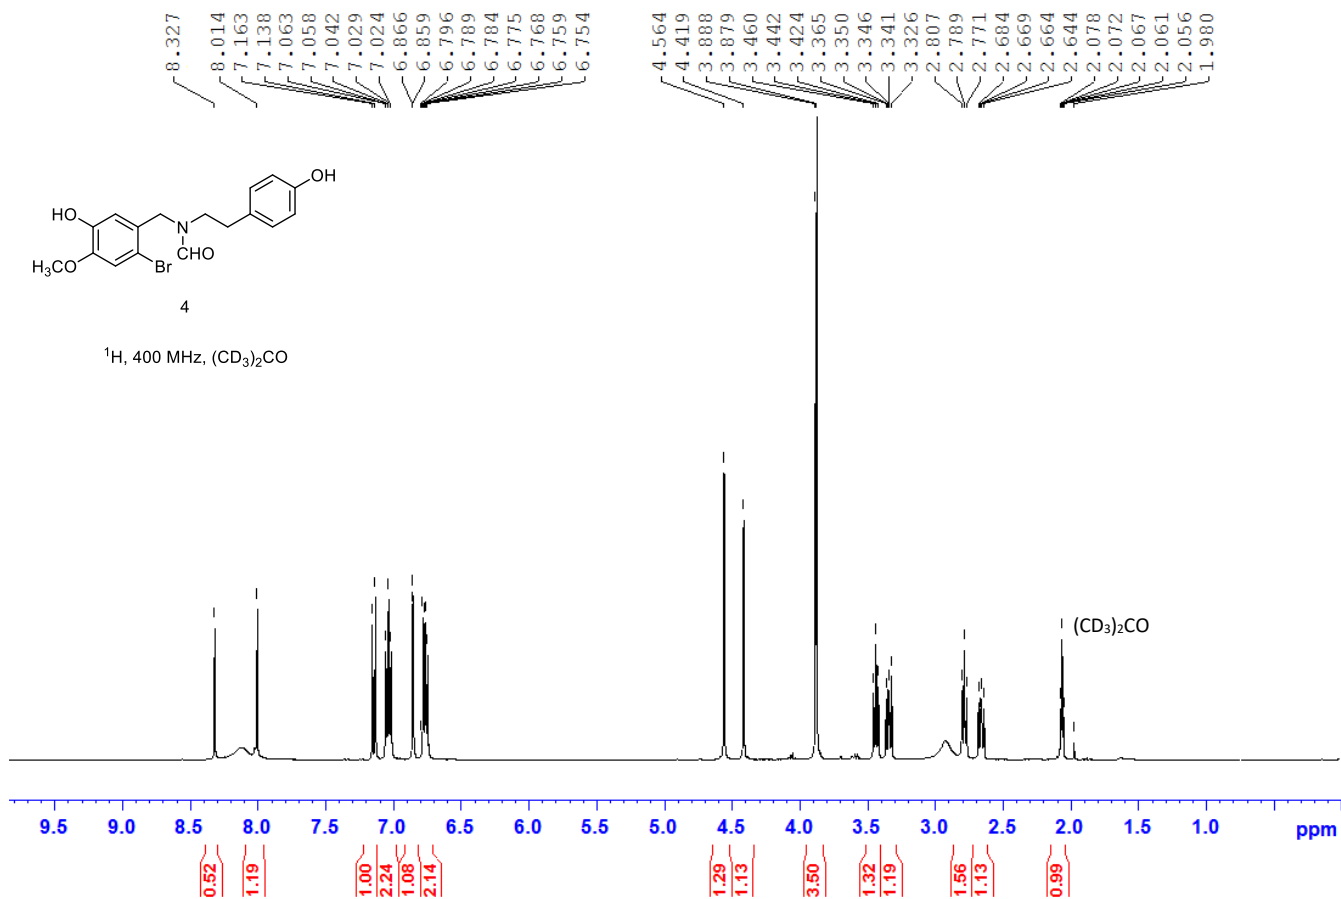

<sup>13</sup>C-NMR of 4-bromo-5-({[2-(4-hydroxyphenyl)ethyl]amino}methyl)-2-methoxyphenol (4)

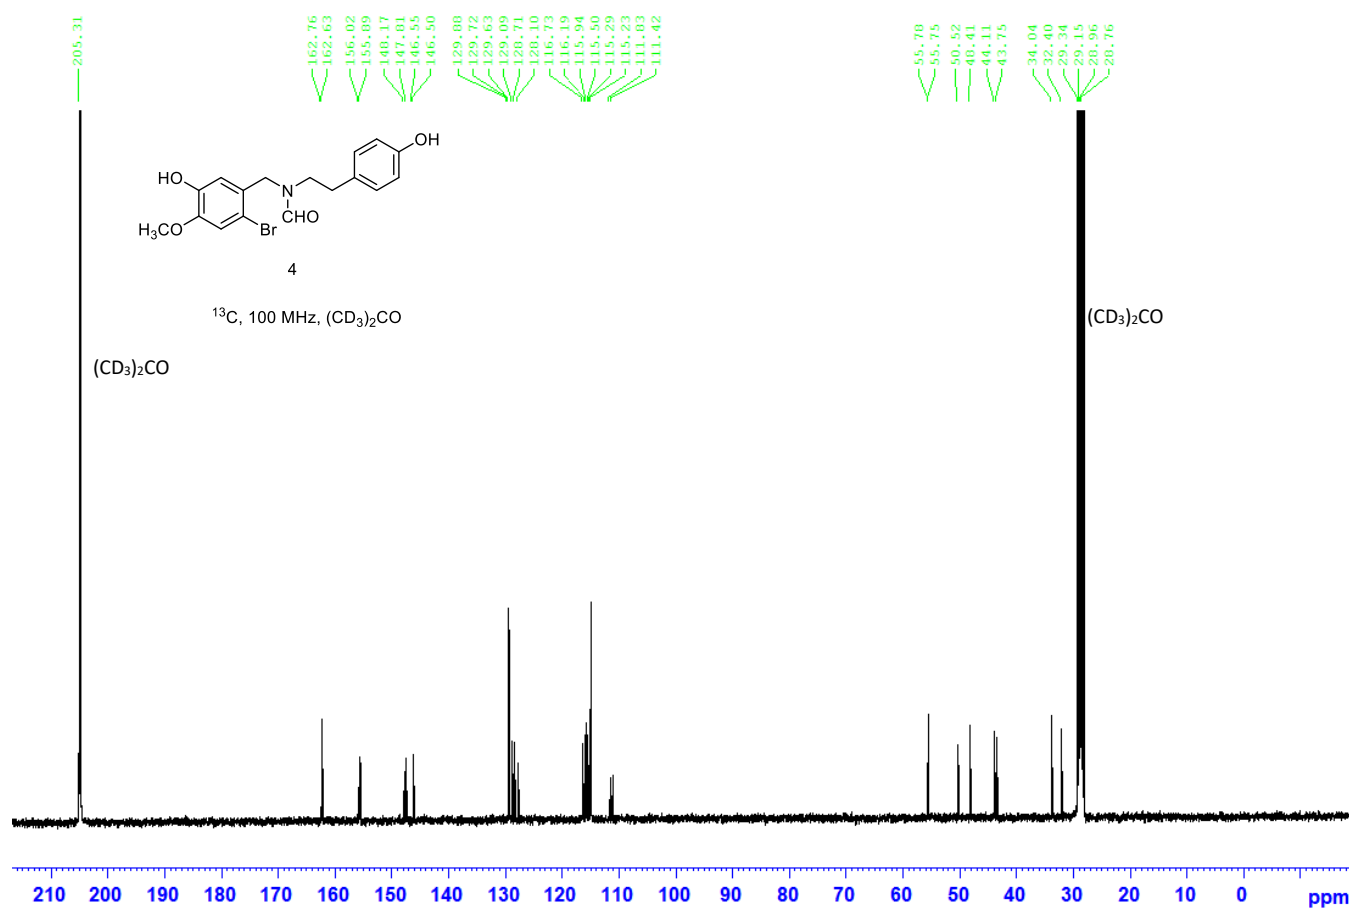

DEPT-135 of 4-bromo-5-({[2-(4-hydroxyphenyl)ethyl]amino)methyl}-2-methoxyphenol (4)

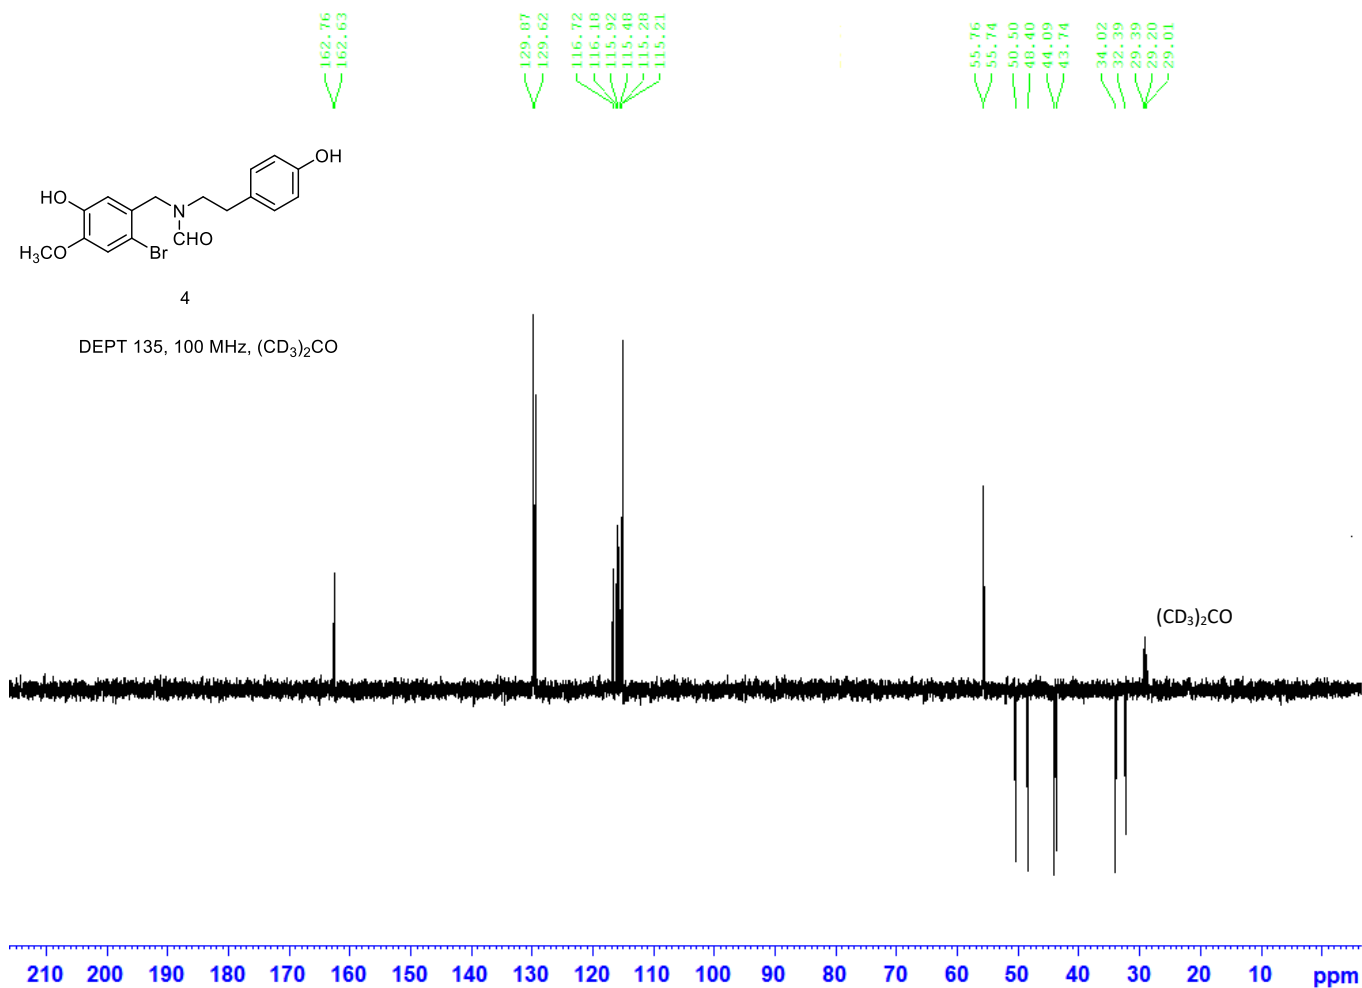

<sup>1</sup>H-NMR of 2-acetyl-9-bromo-7-methoxy-1,2,3,4-tetrahydro-4'H-spiro[2-benzazepine-5,1'-cyclohexa[2,5]diene]-4',6(5aH)-dione (5)

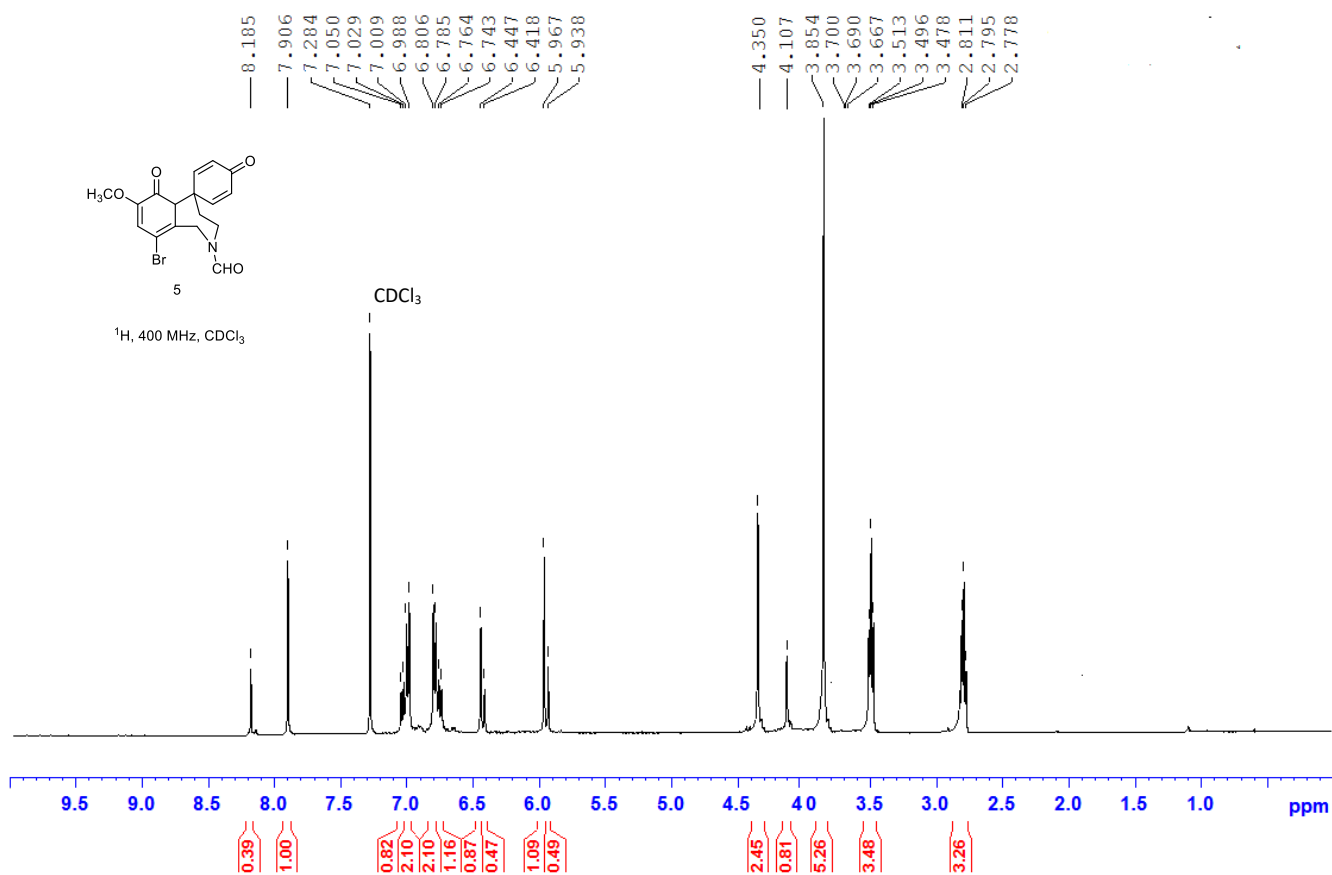



<sup>13</sup>C-NMR of 2-acetyl-9-bromo-7-methoxy-1,2,3,4-tetrahydro-4'H-spiro[2-benzazepine-5,1'-cyclohexa[2,5]diene]-4',6(5aH)-dione (5)

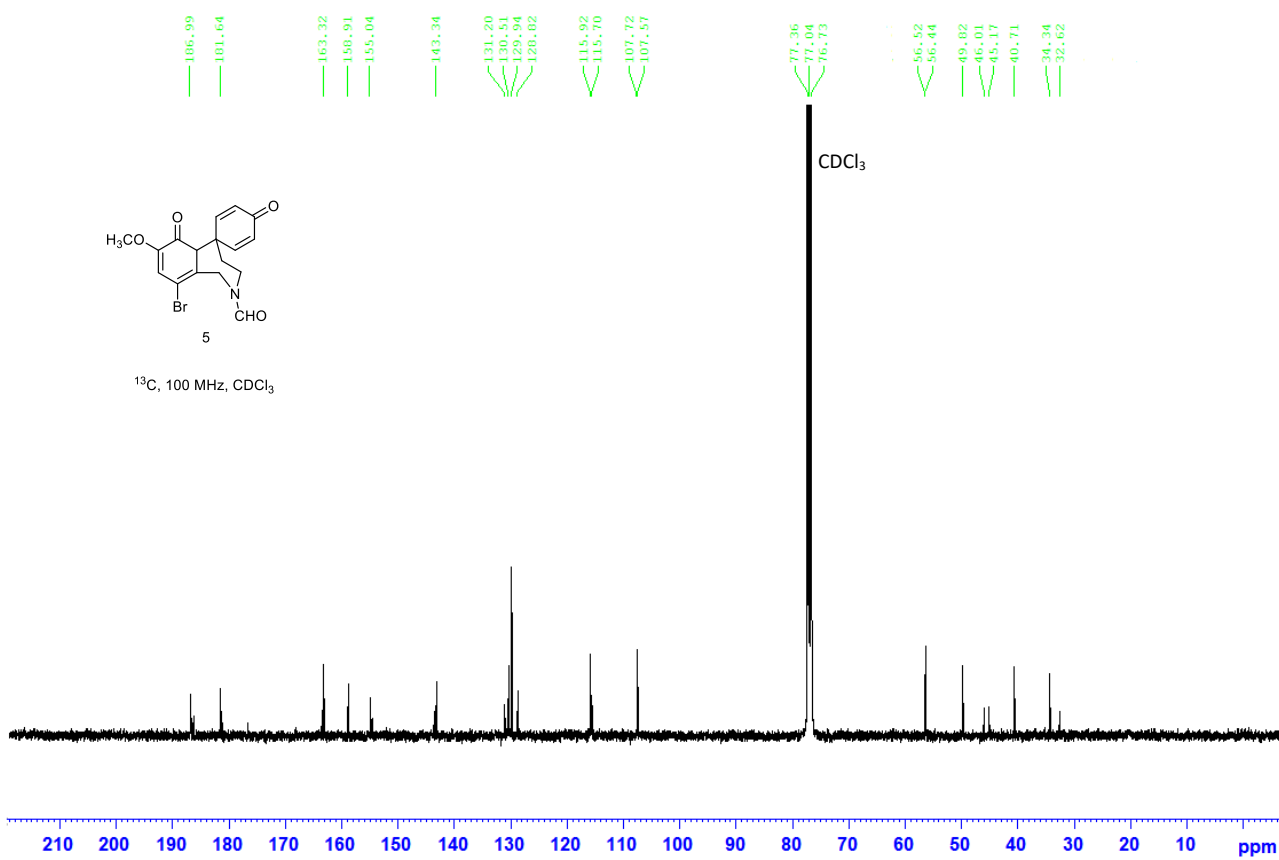

DEPT-135 of 2-acetyl-9-bromo-7-methoxy-1,2,3,4-tetrahydro-4'H-spiro[2-benzazepine-5,1'-cyclohexa[2,5]diene]-4',6(5aH)-dione (5)

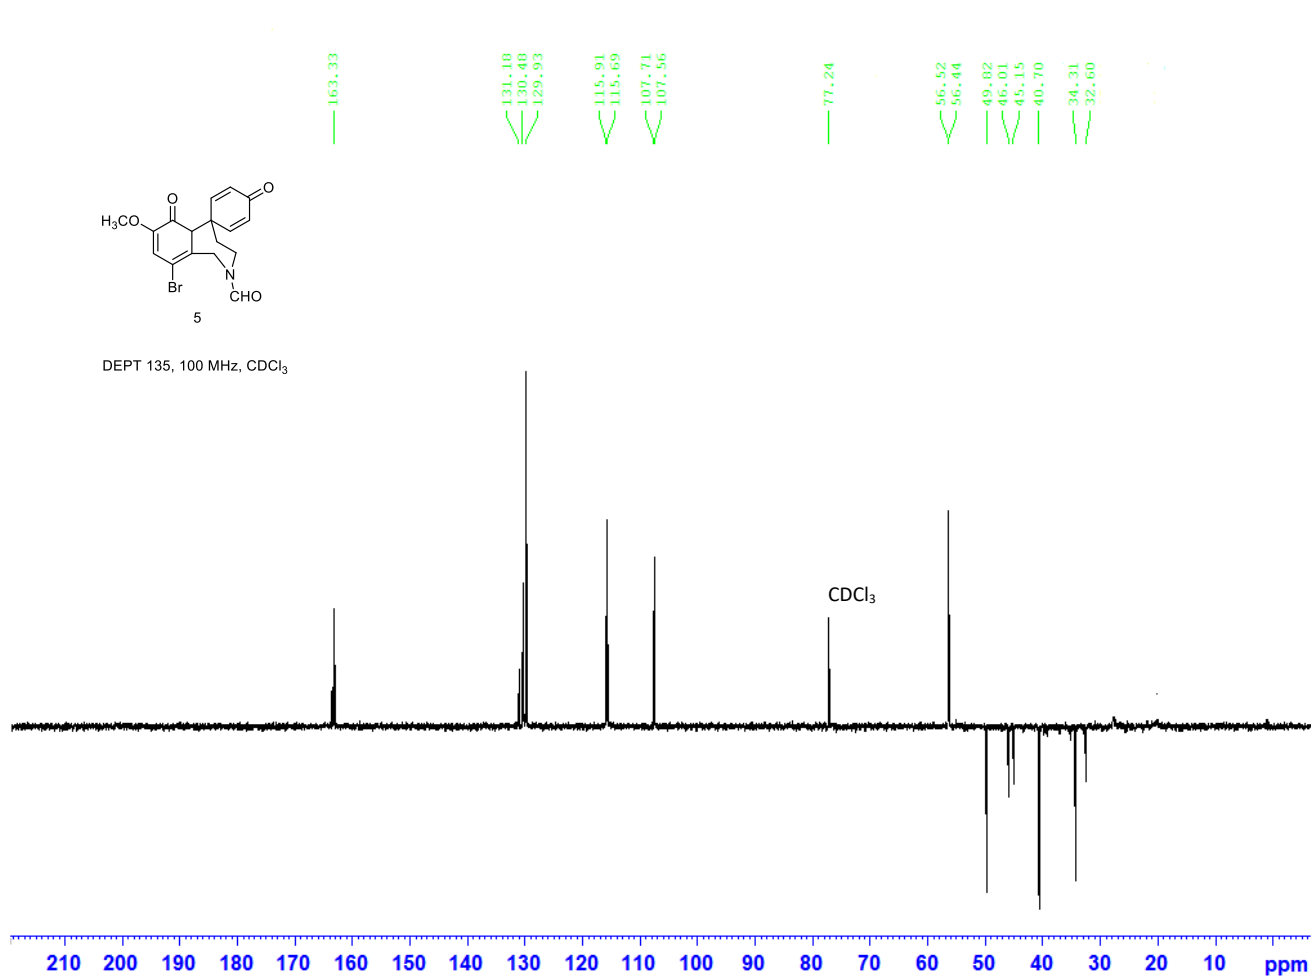

2D-COSY of 2-acetyl-9-bromo-7-methoxy-1,2,3,4-tetrahydro-4'H-spiro[2-benzazepine-5,1'-cyclohexa[2,5]diene]-4',6(5aH)-dione (5)

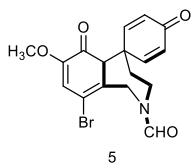

2D-COSY, 400 MHz, CDCl<sub>3</sub>

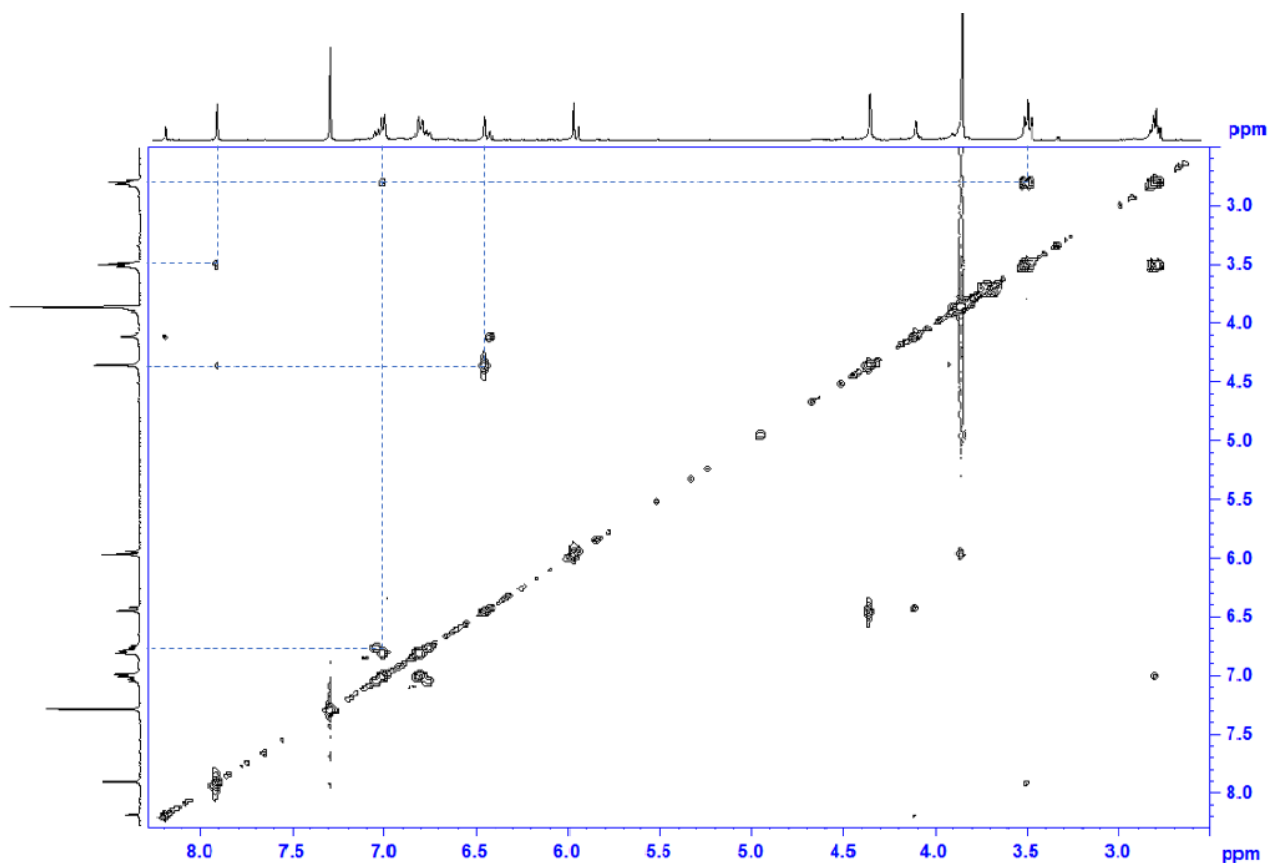

2D-NOESY of 2-acetyl-9-bromo-7-methoxy-1,2,3,4-tetrahydro-4'H-spiro[2-benzazepine-5,1'-cyclohexa[2,5]diene]-4',6(5aH)-dione (5)

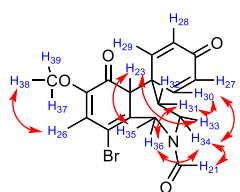

2D-NOESY, 400 MHz, CDCl<sub>3</sub>

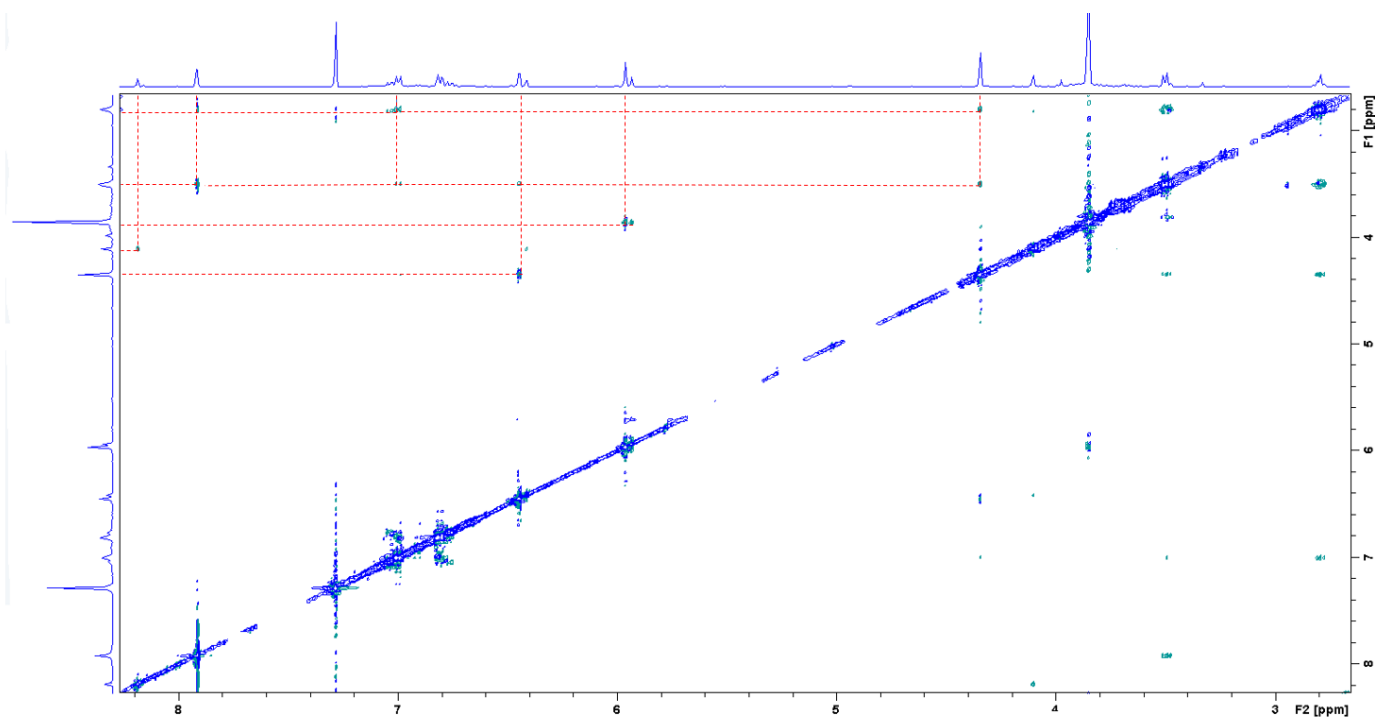

2D-HSQC of 2-acetyl-9-bromo-7-methoxy-1,2,3,4-tetrahydro-4'H-spiro[2-benzazepine-5,1'-cyclohexa[2,5]diene]-4',6(5aH)-dione (5)

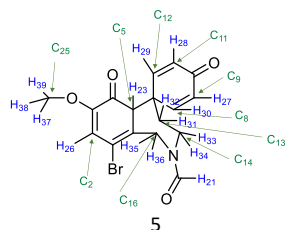

2D-HSQC, 400 MHz, CDCl<sub>3</sub>

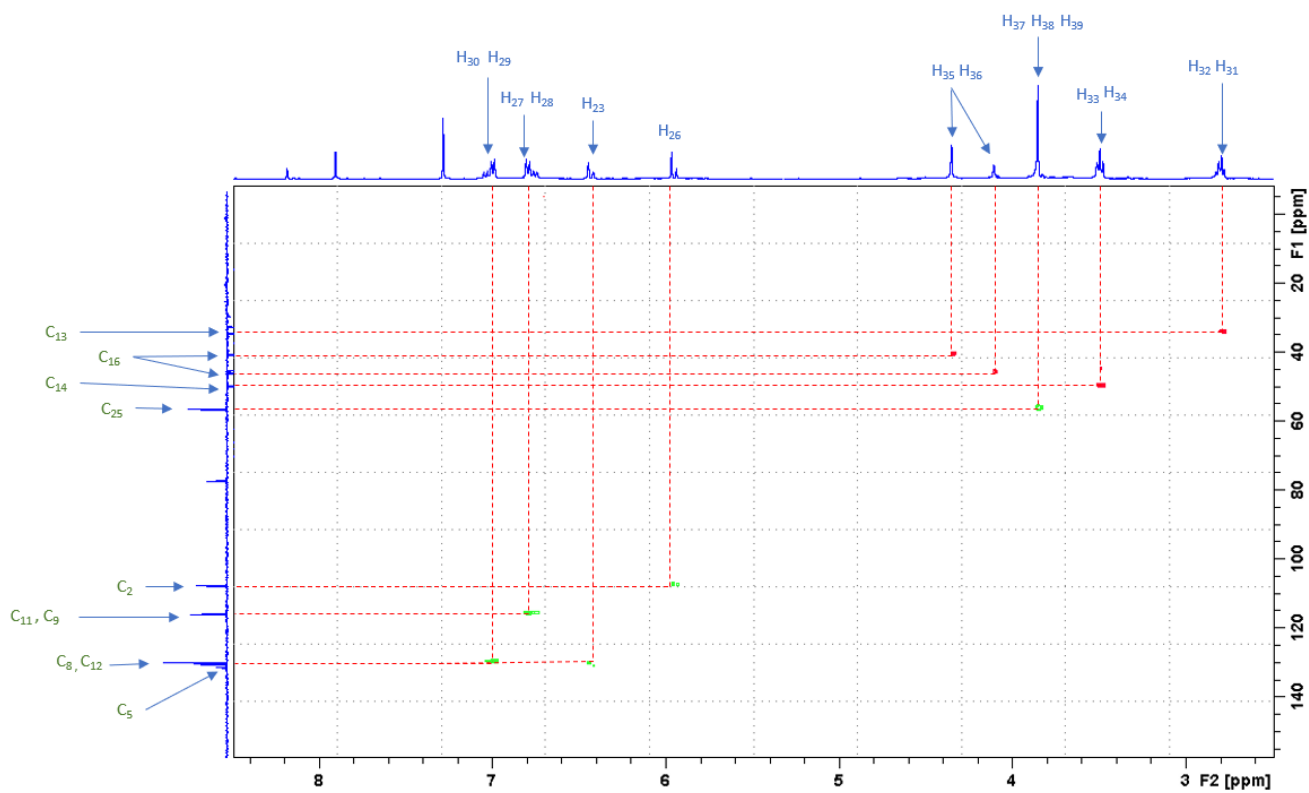

**Table S1:** representative <sup>1</sup>H-NMR, <sup>13</sup>C-NMR (HSQC), DEPT-135, <sup>1</sup>H-<sup>1</sup>H COSY and <sup>1</sup>H-<sup>1</sup>H NOESY data for compound **5**.

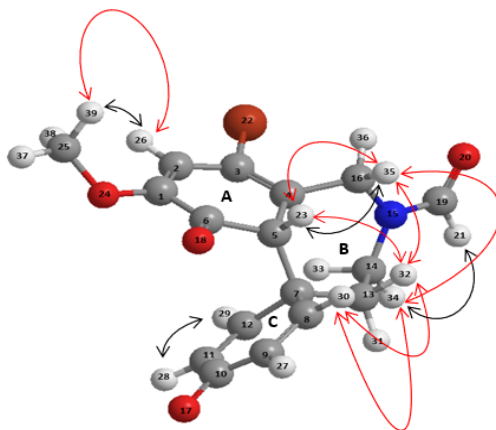

5

| POSITION <sup>[a]</sup> | N <sup>o</sup> [b]<br><sup>1</sup> H $\delta$ (J in Hz) <sup>[c]</sup> | <sup>13</sup> C<br>$\delta$ <sup>[d,e]</sup> | COSY <sup>[f]</sup> | NOESY <sup>[g]</sup> | POSITION <sup>[a]</sup> | N <sup>o</sup> [b]<br><sup>1</sup> H $\delta$ (J in Hz) <sup>[c]</sup> | <sup>13</sup> C<br>$\delta$ <sup>[d,e]</sup> | COSY <sup>[f]</sup> | NOESY <sup>[g]</sup>   |
|-------------------------|------------------------------------------------------------------------|----------------------------------------------|---------------------|----------------------|-------------------------|------------------------------------------------------------------------|----------------------------------------------|---------------------|------------------------|
| C1                      | -                                                                      | 158.9<br>C                                   | -                   | -                    | C10                     | -                                                                      | 181.6<br>C                                   | -                   | -                      |
| C2                      | H-26<br>$\delta$ = 5.96 (1H, s)                                        | 107.7<br>CH                                  | -                   | H-39                 | C11                     | H-28<br>$\delta$ = 6.81 (1H, d, J = 8.0)                               | 115.9<br>CH                                  | H-29                | -                      |
| C3                      | -                                                                      | 155.0<br>C                                   | -                   | -                    | C12                     | H-29<br>$\delta$ = 7.00 (1H, d, J = 7.6)                               | 130.5<br>CH                                  | H-28                | -                      |
| C4                      | -                                                                      | 143.3<br>C                                   | -                   | -                    | C13                     | H-31,32<br>$\delta$ = 2.79 (J = 12.8, 6.4)                             | 49.8<br>CH <sub>2</sub>                      | H-33,34; H-30       | H-21; H-23; H-30; H-35 |
| C5                      | H-23<br>$\delta$ = 6.44 (1H, s)                                        | 131.2<br>CH                                  | H-35                | H-32; H-35           | C14                     | H-33,34<br>$\delta$ = 3.49 (J = 13.6, 6.8)                             | 34.13<br>CH <sub>2</sub>                     | H-31,32; H-21       | H-21; H-30; H-35       |
| C6                      | -                                                                      | 186.9<br>C                                   | -                   | -                    | C16                     | H-35,36<br>$\delta$ = 4.34                                             | 40.7<br>CH <sub>2</sub>                      | H-23; H21           | H-23; H-32; H-34       |
| C7                      | -                                                                      | 128.8<br>C                                   | -                   | -                    | C19                     | H-21<br>$\delta$ = 7.90                                                | 163.3<br>CH                                  | H-35,36; H-33,34    | H-34; H-35             |
| C8                      | H-30<br>$\delta$ = 7.00 (1H, d, J = 7.6)                               | 130.5<br>CH                                  | H-27                | H-32; H-34           | C25                     | H-37,38,39<br>$\delta$ = 3.85                                          | 56.5<br>CH <sub>3</sub>                      | H-26                | H-26                   |
| C9                      | H-27<br>$\delta$ = 6.81 (1H, d, J = 8.0)                               | 115.8<br>CH                                  | H-30                | -                    |                         |                                                                        |                                              |                     |                        |

<sup>[a]</sup>The Numbering of carbon atoms is reported in Figure 2. <sup>[b]</sup> Numbering for the hydrogen atoms bonded to relative carbon position. <sup>[c]</sup>  $\delta$  and J constant values are reported in ppm and Hz, respectively. <sup>[d]</sup> Carbon atoms assignment based on 2D-NMR and <sup>1</sup>H-DEPT-135/HSQC analysis. <sup>[e]</sup> Multiplicity of carbon atoms as determined by using DEPT-135 data. <sup>[f]</sup> Numbering of hydrogen atoms that are correlated by <sup>1</sup>H-<sup>1</sup>H COSY. <sup>[g]</sup> Numbering of hydrogen atoms that are correlated by <sup>1</sup>H-<sup>1</sup>H NOESY.

<sup>1</sup>H-NMR of 9-bromo-7-methoxy-1,2,3,4-tetrahydro-4'H-spiro[2-benzazepine-5,1'-cyclohexa[2,5]diene]-4',6(5aH)-dione (5a)

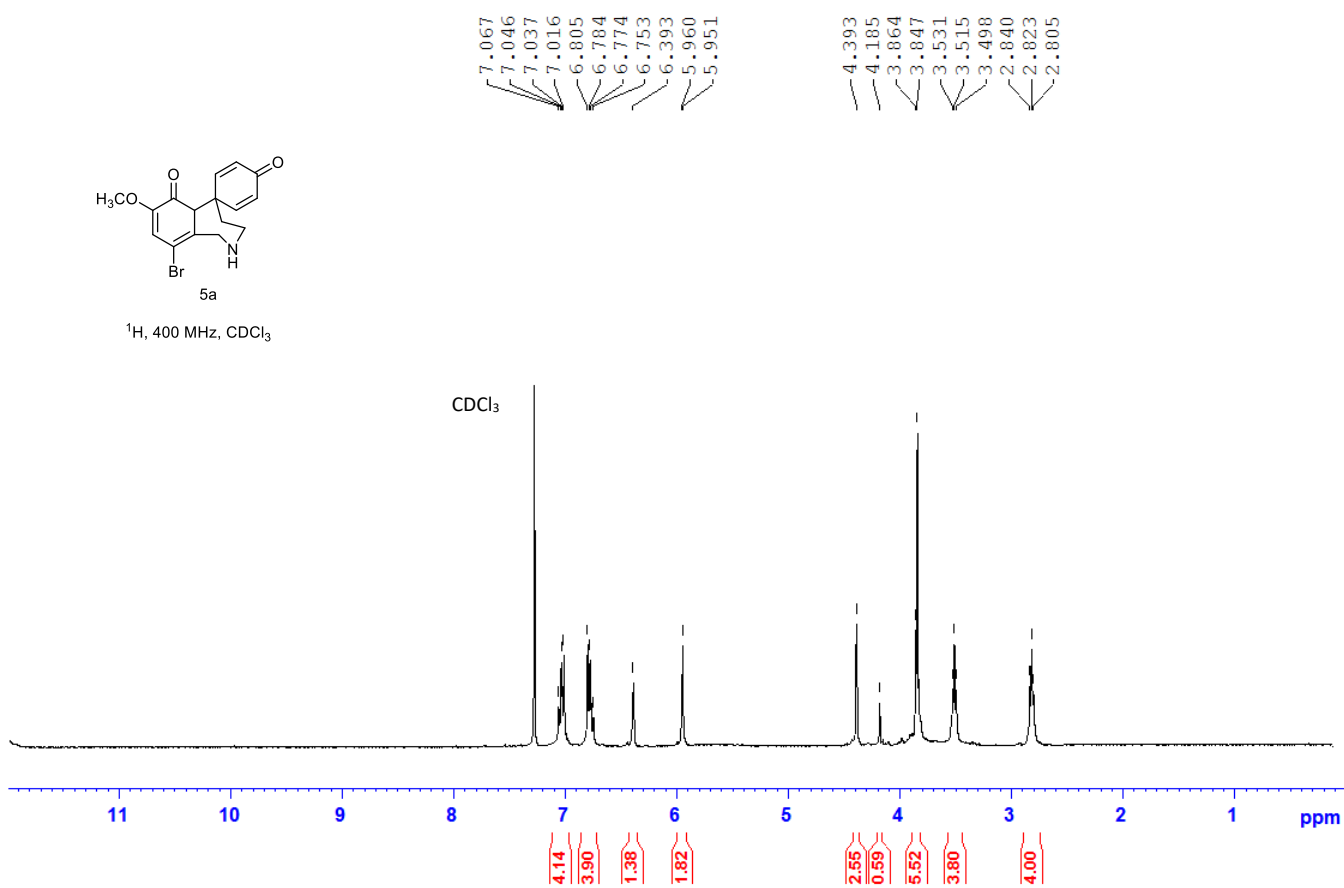

<sup>13</sup>C-NMR of 9-bromo-7-methoxy-1,2,3,4-tetrahydro-4'H-spiro[2-benzazepine-5,1'-cyclohexa[2,5]diene]-4',6(5aH)-dione (5a)

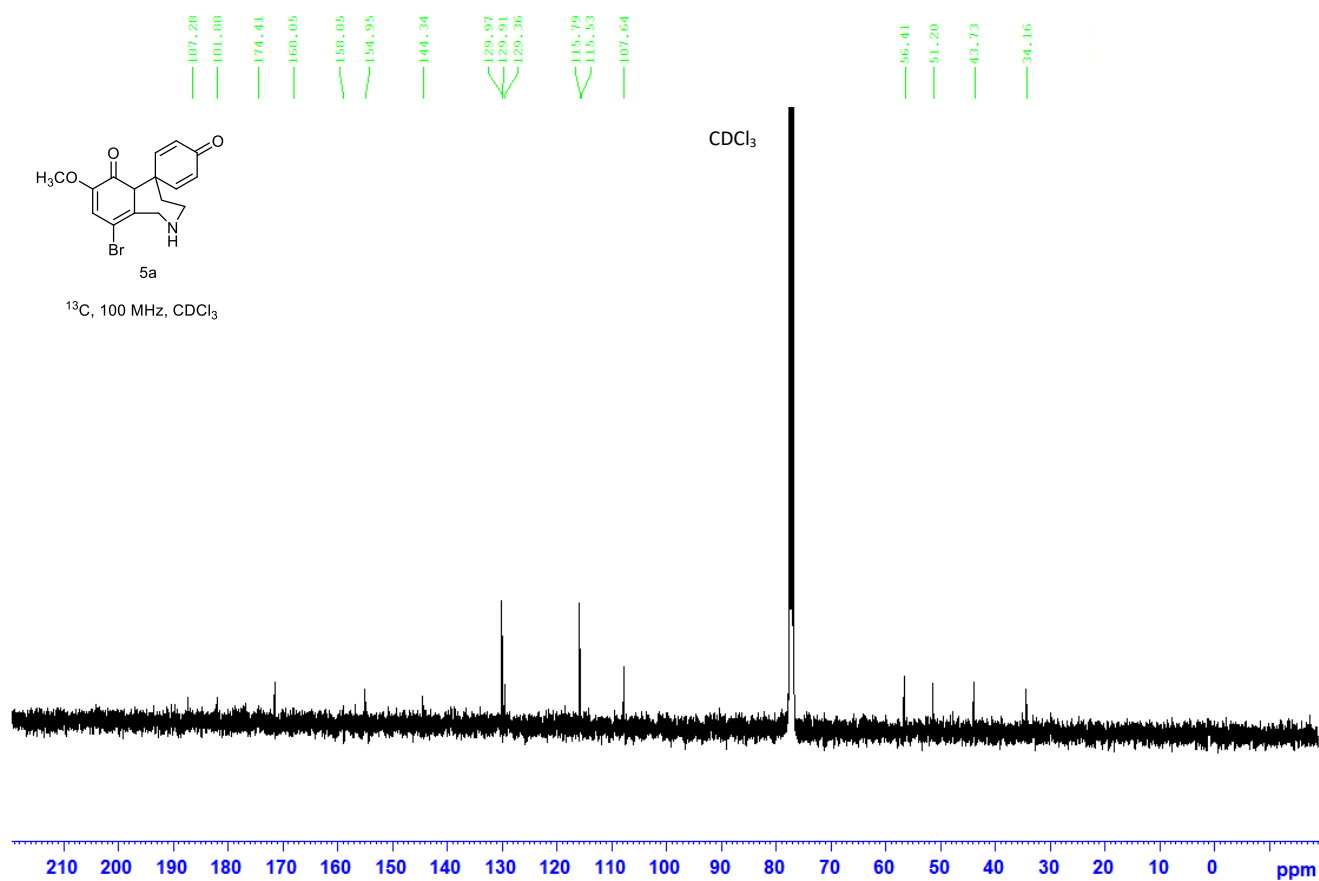



DEPT-135 of 9-bromo-7-methoxy-1,2,3,4-tetrahydro-4'H-spiro[2-benzazepine-5,1'-cyclohexa[2,5]diene]-4',6(5aH)-dione (5a)

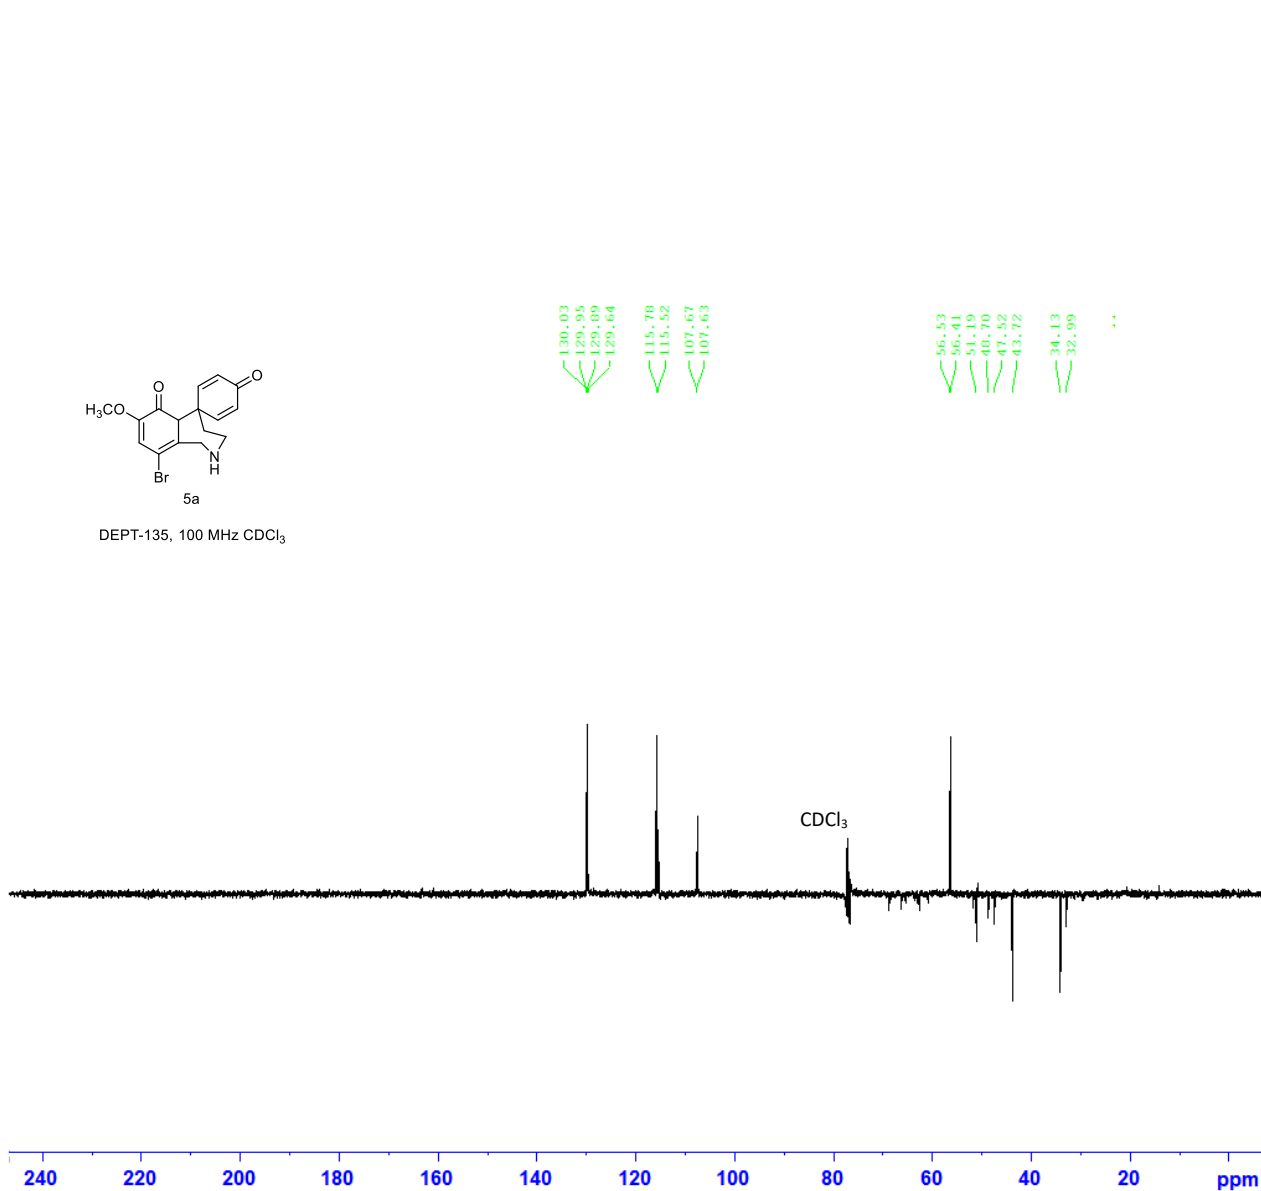

<sup>1</sup>H-NMR of 1-bromo-N-formyl-narwedine (6)

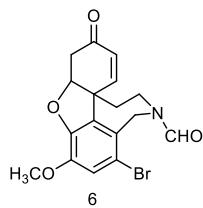

<sup>1</sup>H-NMR, 400 MHz, DMSO-*d*<sub>6</sub>

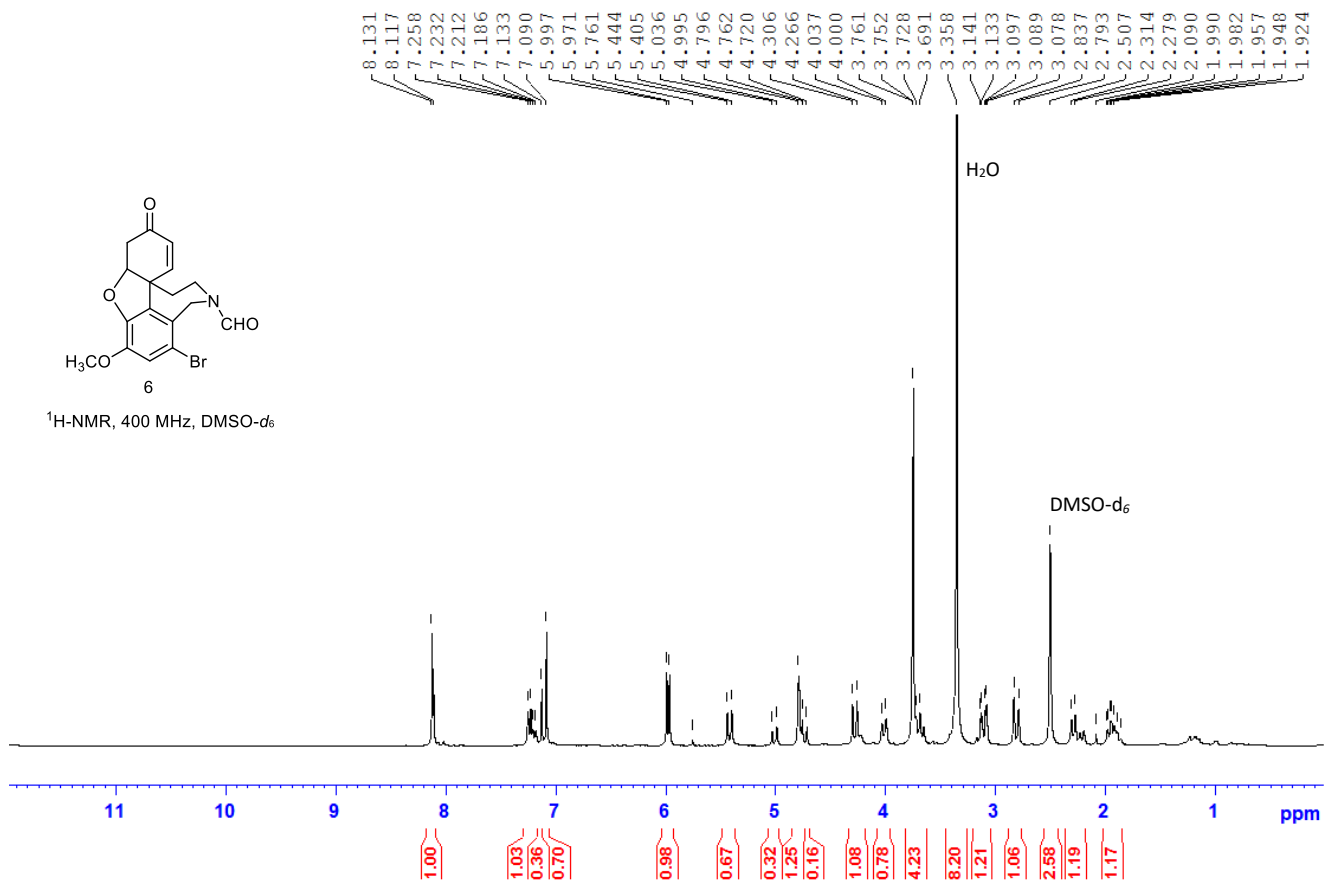

<sup>13</sup>C-NMR of 1-bromo-N-methyl-narwedine (6)

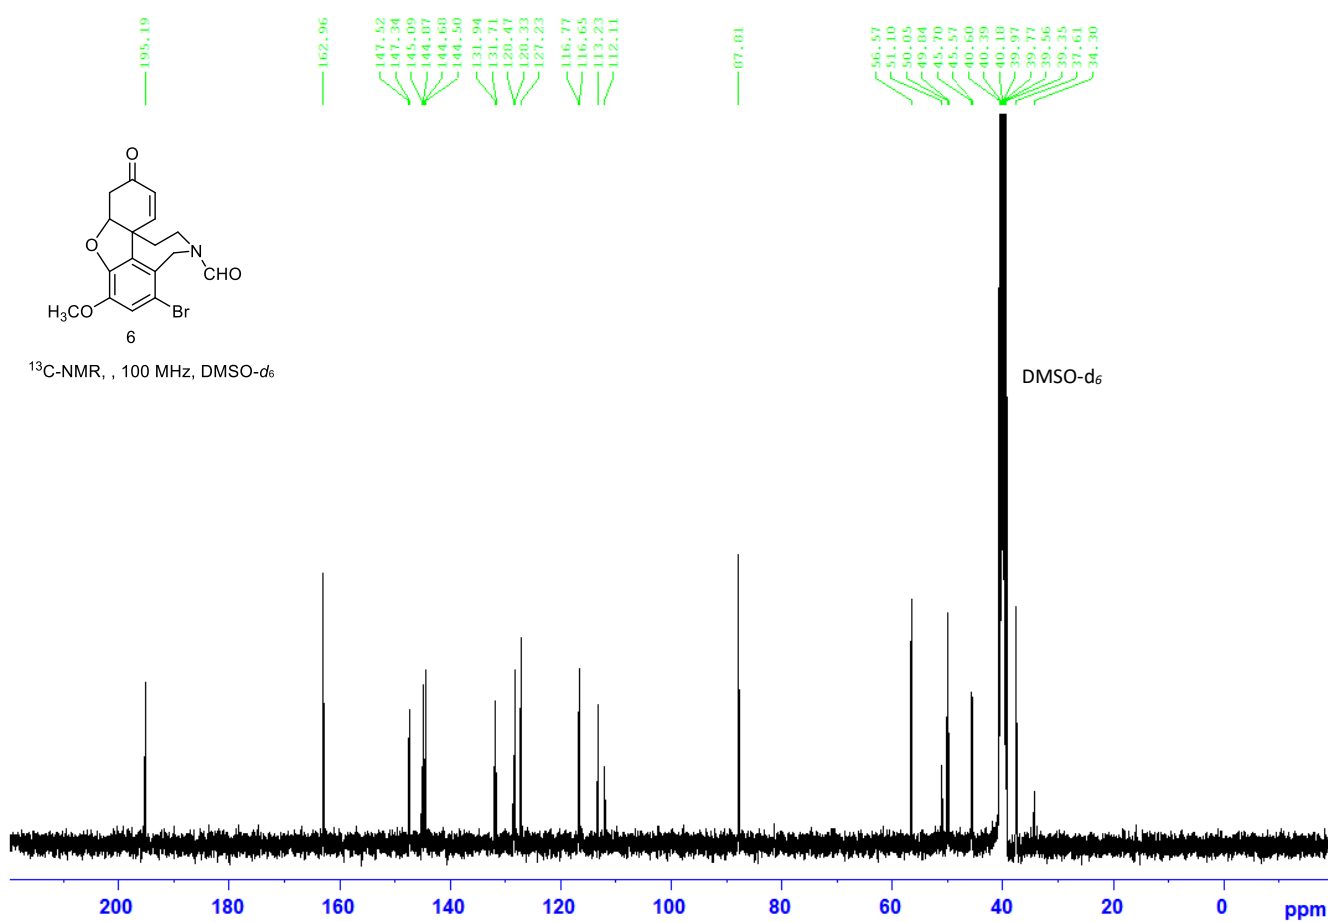

<sup>1</sup>H-NMR of galantamine (3)

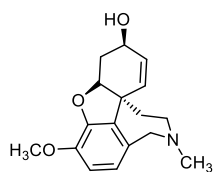

**3**

<sup>1</sup>H-NMR, 400 MHz, DMSO-d<sub>6</sub>

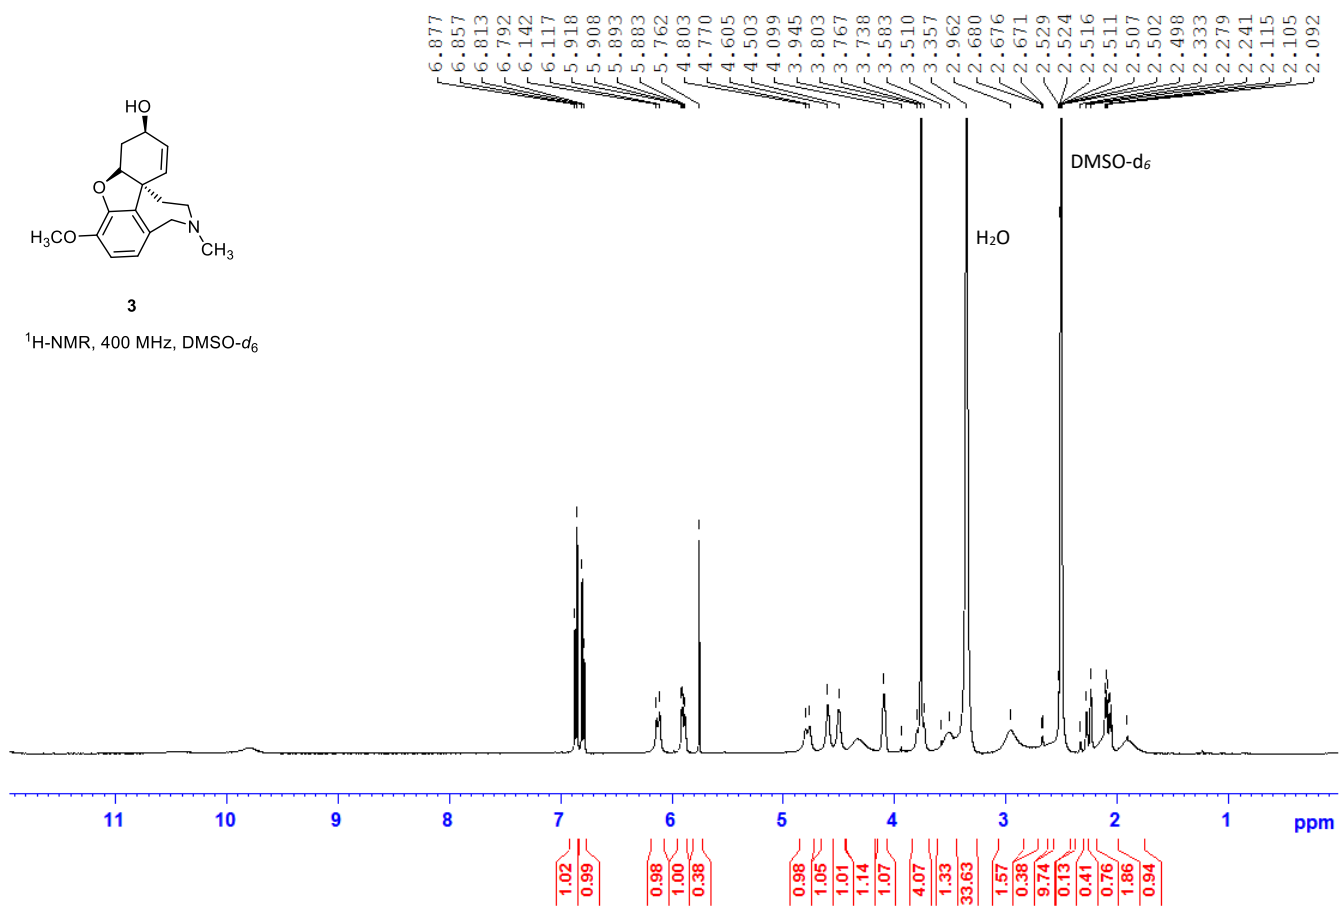

<sup>13</sup>C-NMR of galantamine (3)

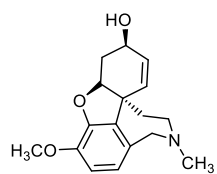

3

<sup>13</sup>C-NMR, 100 MHz, DMSO-d<sub>6</sub>

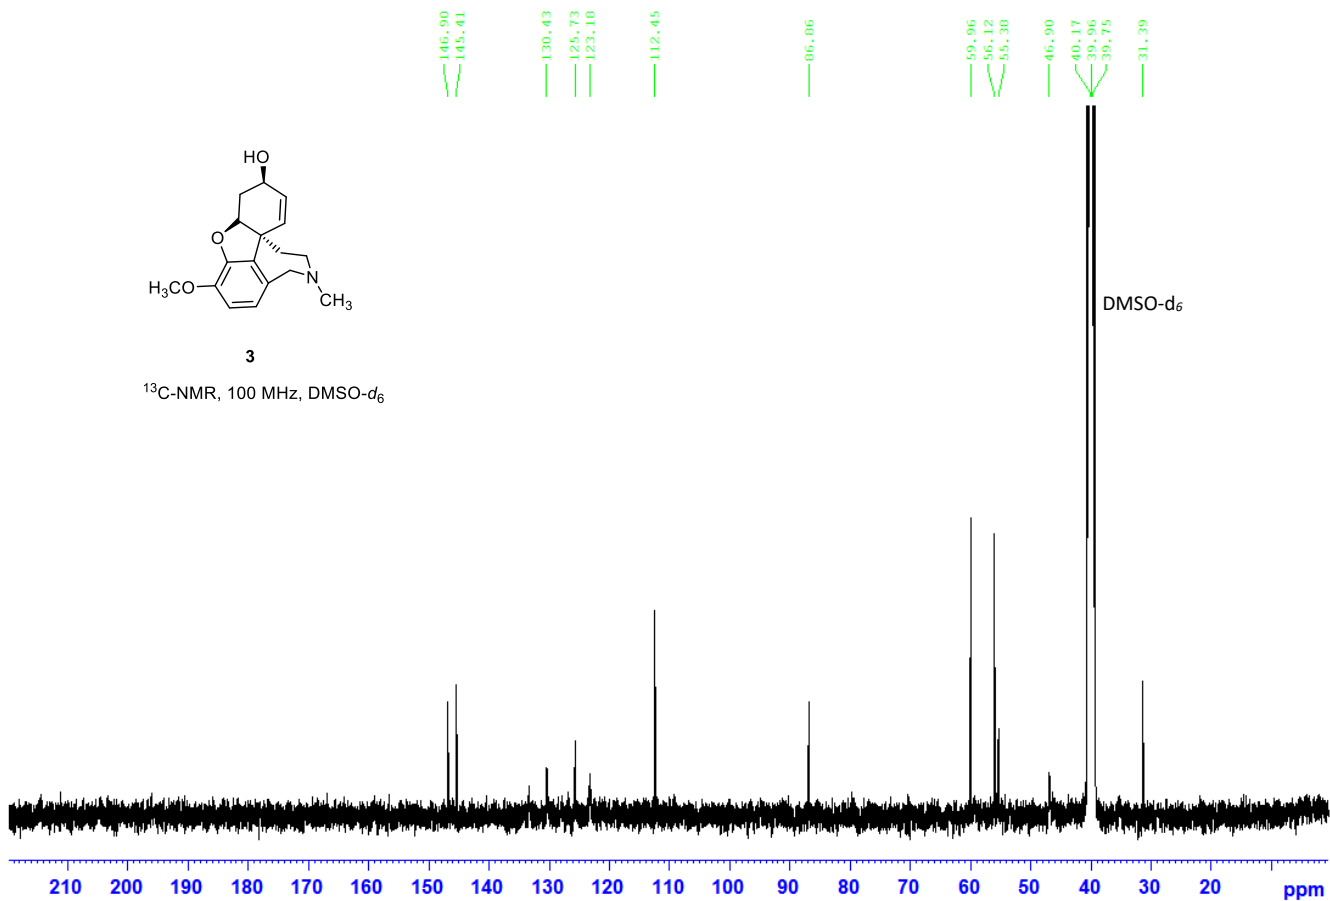

**<sup>1</sup>H-NMR of 4-bromo-5-[[[2-(4-hydroxyphenyl)ethyl](methyl)amino]methyl]-2-methoxyphenol (7)**

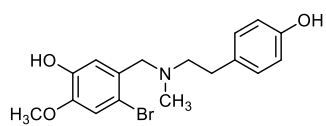

7

<sup>1</sup>H-NMR, 400 MHz, CDCl<sub>3</sub>

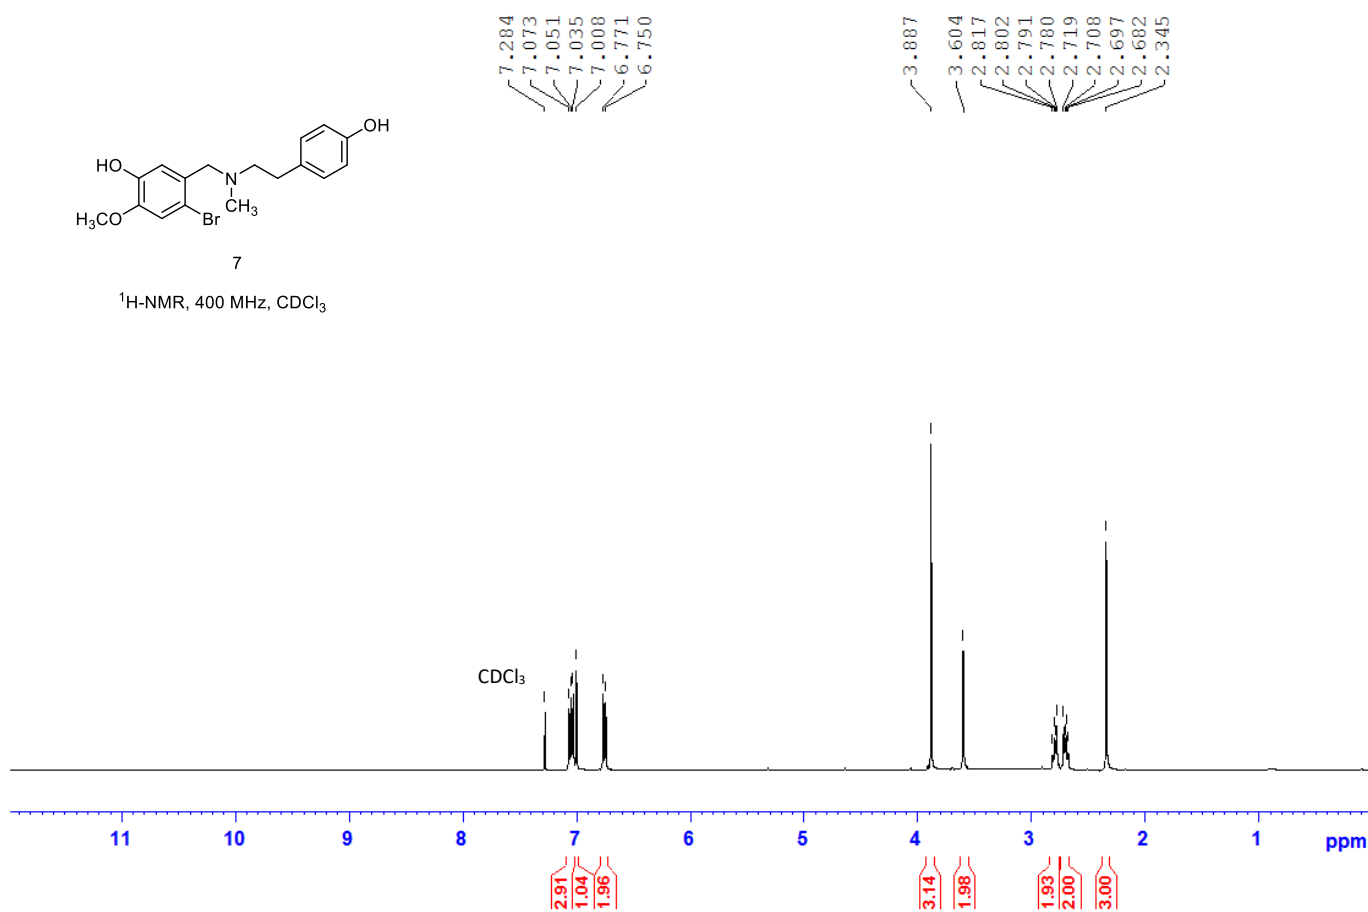

**<sup>13</sup>C-NMR of 4-bromo-5-[[[2-(4-hydroxyphenyl)ethyl](methyl)amino]methyl]-2-methoxyphenol (7)**

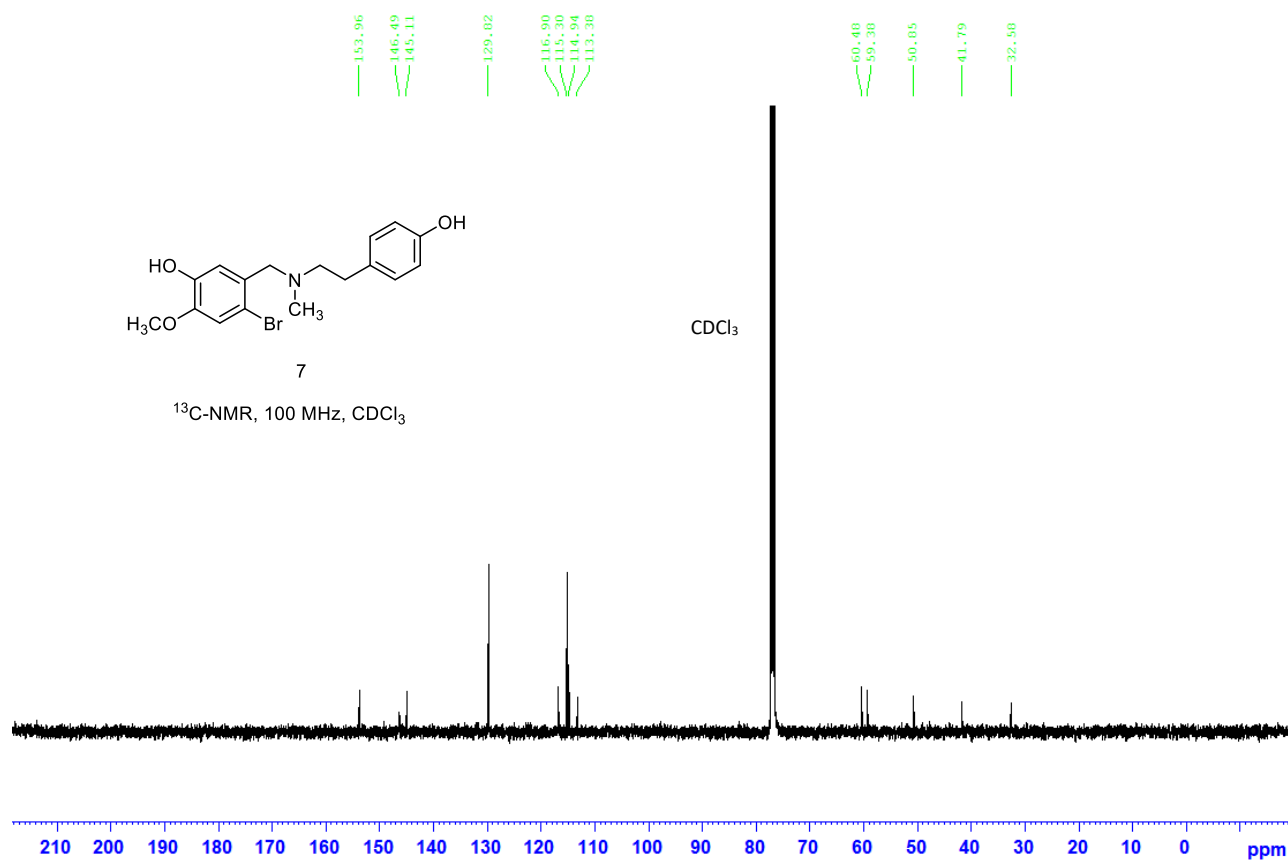

**<sup>1</sup>H-NMR of 7-bromo-2-[2-(4-hydroxyphenyl)ethyl]-5-methoxyisindolin-4-ol (10)**

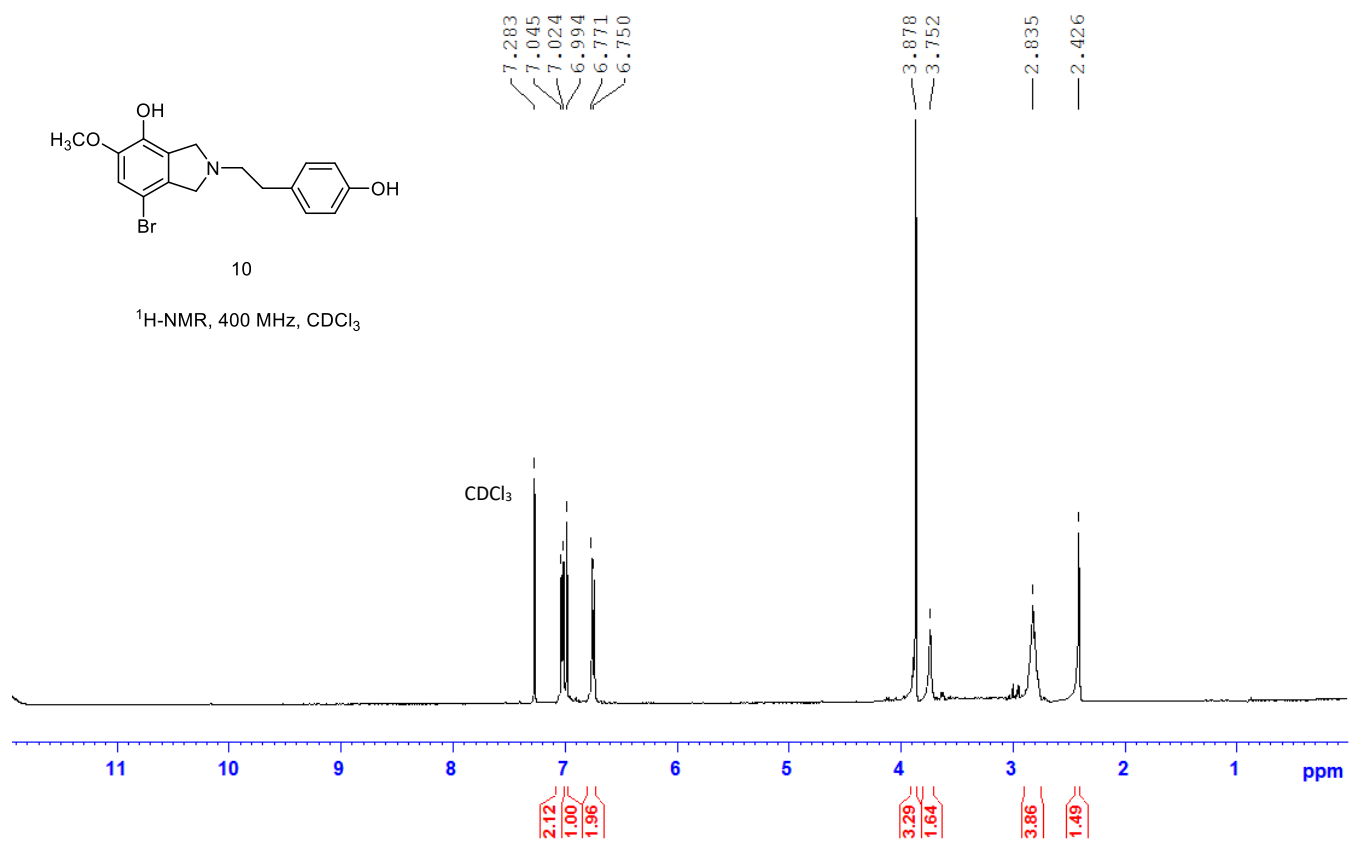



<sup>13</sup>C-NMR of 7-bromo-2-[2-(4-hydroxyphenyl)ethyl]-5-methoxyisoindolin-4-ol (10)

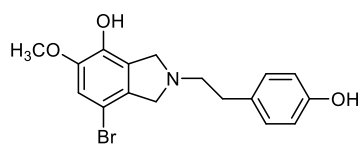

10

<sup>13</sup>C-NMR, 100 MHz, CDCl<sub>3</sub>

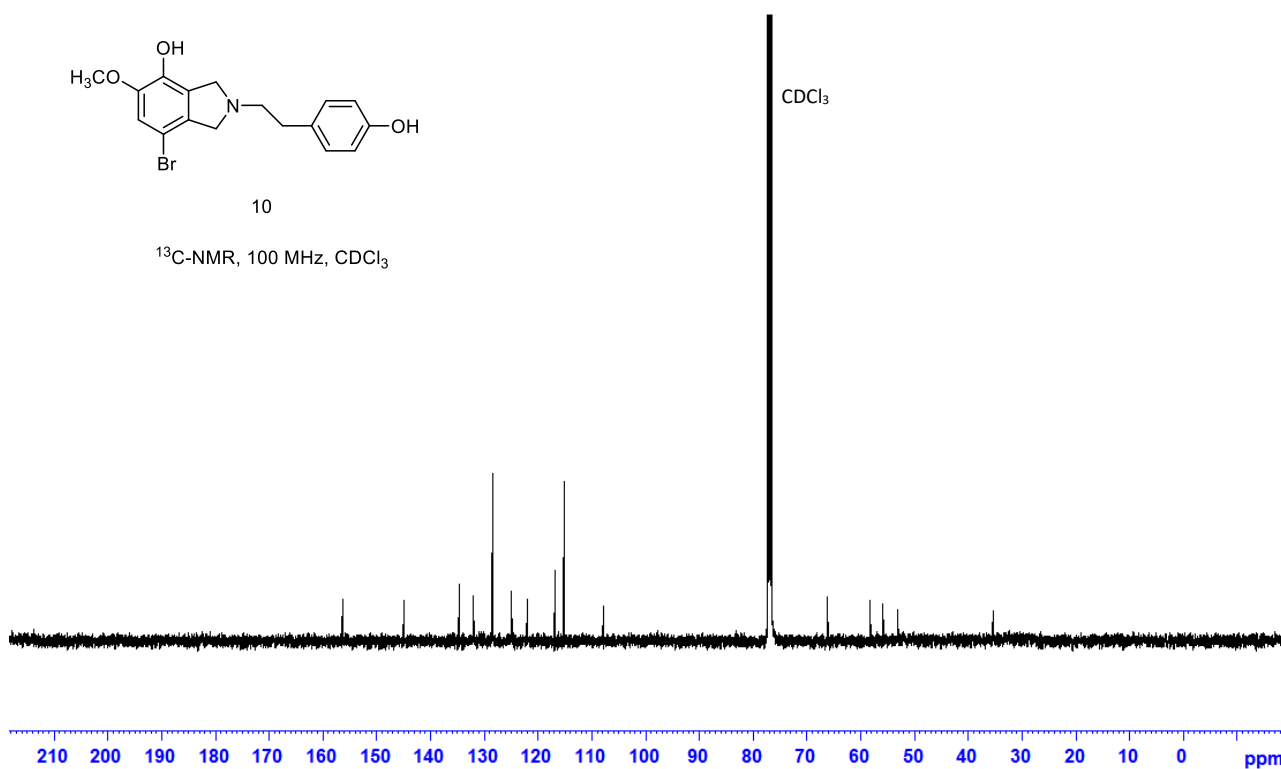

## EPR spectra

EPR spectrum recorded in the presence of laccase (0.14 mM) and TEMPO (6  $\mu$ M)

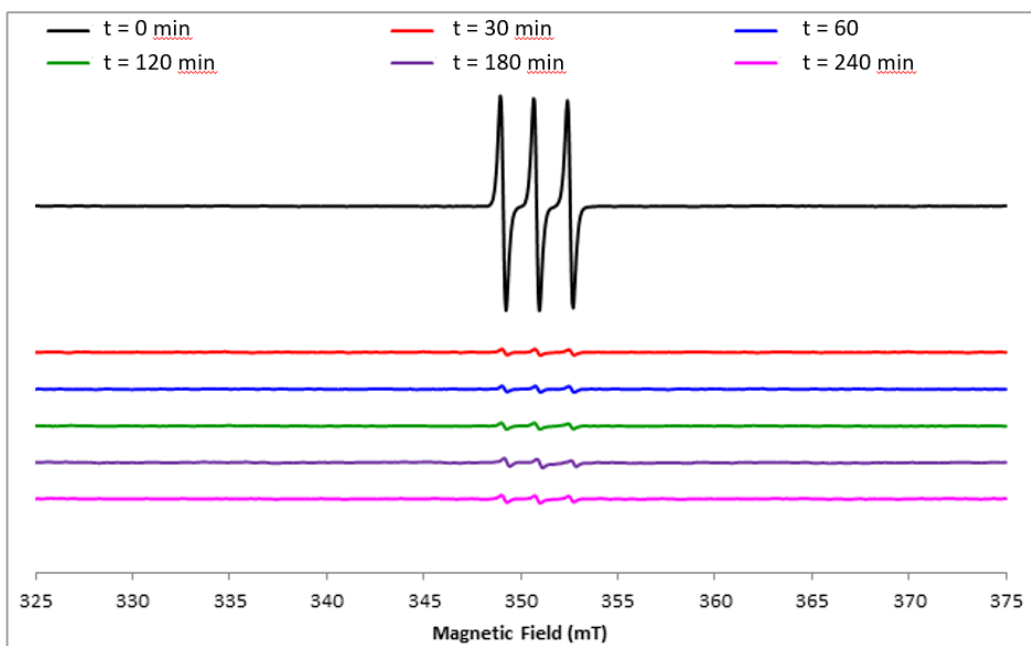

EPR spectrum recorded in the presence of laccase (0.14 mM), TEMPO (6  $\mu$ M) and compound 5

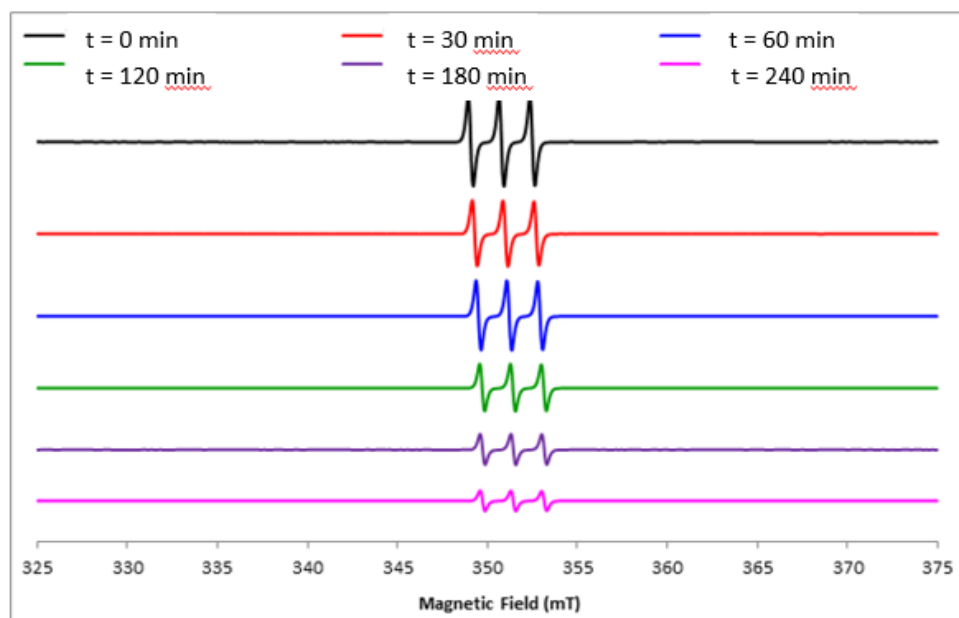

EPR spectrum recorded in the presence of laccase (0.14 mM) and TEMPO (0.6 mM)

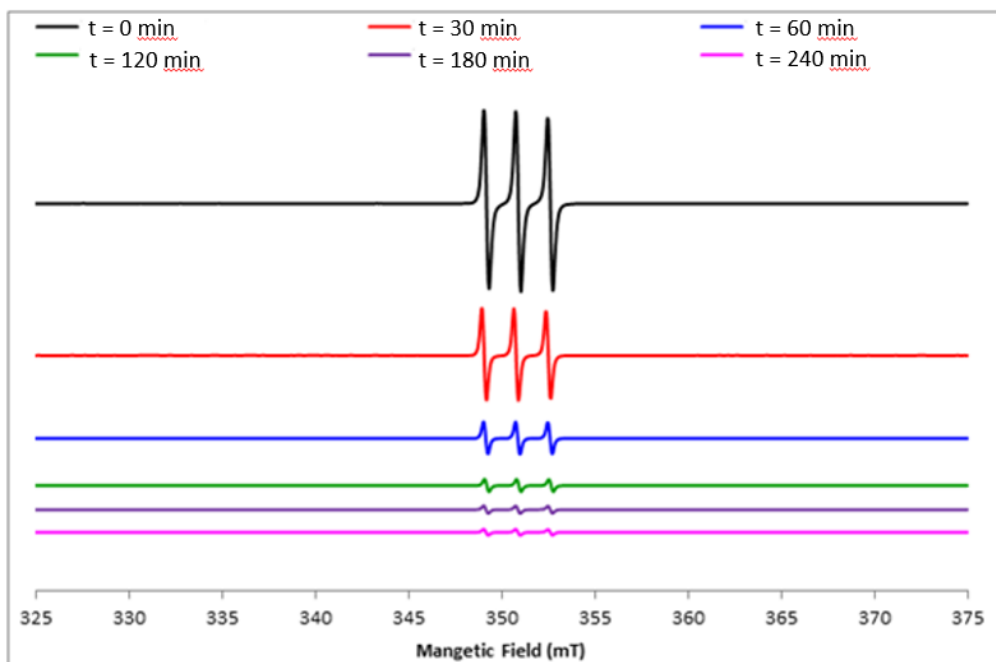

EPR spectrum recorded in the presence of laccase (0.14 mM), TEMPO (0.6 mM) and compound 5

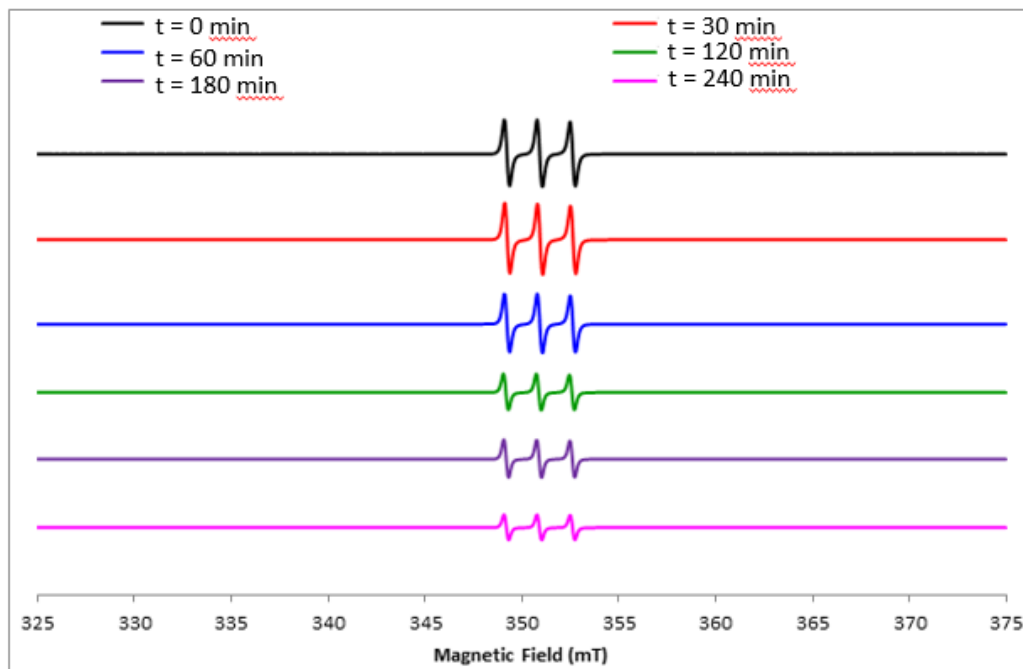

Supplement: d0ra00935k1.pdf [file d0ra00935k1.pdf]
